1 **How to deal with toxic amino acids: the bipartite AzlCD complex exports histidine in *Bacillus***

2 ***subtilis***

3

4 Janek Meißner<sup>a</sup>, Thorben Schramm<sup>b</sup>, Ben Hoßbach<sup>a</sup>, Katharina Stark<sup>a</sup>, Hannes Link<sup>b</sup>, and Jörg Stülke<sup>a\*</sup>

5

6

7 <sup>a</sup> Department of General Microbiology, Institute for Microbiology & Genetics, GZMB, Georg-August-  
8 University Göttingen, 37077 Göttingen, Germany

9 <sup>b</sup> Interfaculty Institute for Microbiology and Infection Medicine Tübingen, University of Tübingen, 72076  
10 Tübingen, Germany

11

12 Running title: Histidine export by the bipartite exporter AzlCD

13

14 \* To whom correspondence should be addressed. Tel: +49 5513923781; Fax: +49 551 3923808; Email:  
15 [jstuelk@gwdg.de](mailto:jstuelk@gwdg.de)

16

17

18 **ABSTRACT**

19 In the Gram-positive model bacterium *Bacillus subtilis*, the presence of the amino acid glutamate triggers  
20 potassium uptake due to the glutamate-mediated activation of the potassium channel KtrCD. As a result,  
21 the intracellular accumulation of glutamate is toxic in strains lacking the second messenger cyclic di-AMP  
22 since these cells are unable to limit potassium uptake. We observed that the presence of histidine, which  
23 is degraded to glutamate, is also toxic for a *B. subtilis* strain that lacks all three c-di-AMP synthesizing  
24 enzymes. However, suppressor mutants emerged, and whole genome sequencing revealed mutations in  
25 the *azlB* gene encoding the repressor of the *azl* operon. This operon encodes an exporter and an  
26 importer for branched-chain amino acids. The suppressor mutations result in overexpression of the *azl*  
27 operon. Deletion of the *azlCD* genes encoding the branched-chain amino acid exporter restored the  
28 toxicity of histidine indicating that this exporter is required for histidine export and resistance to  
29 otherwise toxic levels of the amino acid. The higher abundance of the amino acid exporter AzlCD  
30 increased the extracellular concentration of histidine, thus confirming the new function of AzlCD as a  
31 histidine exporter. Unexpectedly, AzlB-mediated repression of the operon remains active even in the  
32 presence of amino acids suggesting that expression of the *azl* operon requires mutational inactivation of  
33 AzlB.

34

35 **IMPORTANCE**

36 Amino acids are building blocks for protein biosynthesis in each living cell. However, due to their  
37 reactivity as well as the similarity between several amino acids, they may also be involved in  
38 harmful reactions or in non-cognate interactions and thus be toxic. *Bacillus subtilis* can deal with  
39 otherwise toxic histidine by overexpressing a bipartite amino acid exporter AzlCD. Although encoded in  
40 an operon that also contains a gene for an amino acid importer, the corresponding genes are not  
41 expressed, irrespective of the availability or not of amino acids in the medium. This suggests that the *azl*

42 operon is a last resort to deal with histidine stress that can be expressed due to mutational inactivation  
43 of the cognate repressor, AzlB.

44

45 **KEYWORDS**

46 *Bacillus subtilis*, cyclic di-AMP, amino acid export, histidine, amino acid toxicity, silent genes

47

48

49 **INTRODUCTION**

50 Amino acids are the essential building blocks for protein biosynthesis and many other cellular  
51 components. Cells can acquire amino acids by uptake from the environment, by degradation of external  
52 peptides or proteins, or by *de novo* biosynthesis. Many bacteria such as the model organisms *Escherichia*  
53 *coli* and *Bacillus subtilis* can use all three possibilities for amino acid acquisition. Although amino acids  
54 are essential for growth, they can be toxic due to misloading of tRNAs resulting in misincorporation into  
55 proteins and from their high reactivity. Moreover, many amino acids are chemically very similar to each  
56 other, and one amino acid that is available in excess may competitively inhibit the biosynthetic  
57 pathway(s) of similar amino acids by binding to the corresponding enzymes (1).

58 We are interested in the identification of the components that allow life of a simple minimal cell  
59 and in the construction of such cells based on the model bacterium *B. subtilis* (2, 3). Such minimal  
60 organisms are not only important to get a comprehensive understanding of the requirements of cellular  
61 life but they are also important workhouses in biotechnological and biomedical applications. Indeed,  
62 minimal organisms have been proven to be superior to conventionally constructed strains in the  
63 production and secretion of difficult proteins and lantibiotics (4, 5, 6). For *B. subtilis*, the pathways for all  
64 amino acid biosyntheses have been completely elucidated. In contrast, the knowledge about amino acid  
65 transport is far from being complete as for several amino acids no transporter has been identified so far.  
66 This knowledge is important for the construction of genome-reduced strains that may be designed to  
67 grow in complex or minimal medium and thus require the complete set of uptake or biosynthetic  
68 enzymes, respectively. Moreover, some amino acids such as glutamate are toxic for *B. subtilis* even at  
69 the concentrations present in standard complex medium if the catabolizing enzymes, e.g. glutamate  
70 dehydrogenase, are absent (7, 8). Thus, a complete understanding of all components involved in cellular  
71 amino acid homeostasis is required for the successful generation of minimal organisms.

72 Amino acid toxicity is not only relevant for the design of minimal genomes but it is also an  
73 important tool for the identification of components involved in amino acid metabolism. While some

74 amino acids such as serine or threonine are toxic already for wild type strains (1, 9, 10), others are well  
75 tolerated. In this case, the corresponding D-amino acids, amino acid analogs, or structually similar  
76 metabolites may act as anti-metabolites that inhibit normal cellular metabolism and thus growth of the  
77 bacteria. The application of toxic amino acids or of similar compounds to a bacterial growth medium will  
78 inhibit growth but will also result in the acquisition of suppressor mutations that allow the cells to  
79 resolve the issue of amino acid toxicity. Often, such mutations affect uptake systems and prevent the  
80 uptake of the toxic amino acid or its analogues. In this way, transporters for threonine, proline, alanine,  
81 serine, and glutamate as well as for the anti-metabolites 4-hydroxy-L-threonine and glyphosate have  
82 been identified in *B. subtilis* (9, 10, 11, 12, 13, 14, 15). A second way to achieve resistance against toxic  
83 amino acids is the activation of export mechanisms. This has been reported in the cases of 4-azaleucine  
84 and glutamate (14, 16). Third, suppressor mutations may facilitate detoxification of the toxic amino acid  
85 by degradation or modification to a non-toxic metabolite as observed for glutamate and serine (7, 10, 14,  
86 17). Forth, the protein target of the toxic metabolite may be modified in a way that it becomes resistant  
87 (18). Finally, the bacteria can escape inactivation by increased expression of the target protein as has  
88 been reported for serine and the anti-metabolite glyphosate (10, 15).

89         Recently, it has been shown that the sensitivity of *B. subtilis* to glutamate is strongly enhanced if  
90 the bacteria are unable to produce the second messenger cyclic di-AMP (c-di-AMP) (14). This second  
91 messenger is essential for growth of *B. subtilis* on complex medium, and it is toxic upon intracellular  
92 accumulation (19). Both essentiality and toxicity are mainly a result of the central role of c-di-AMP in  
93 potassium homeostasis. The second messenger prevents the intracellular accumulation of potassium by  
94 inhibiting potassium import and by stimulating potassium export. Thus, the intracellular potassium  
95 concentration is kept within a narrow range (19, 20). The presence of high potassium concentrations in a  
96 strain lacking c-di-AMP results in the activation of potassium export by the acquisition of mutations in a  
97 sodium/H<sup>+</sup> antiporter. These mutations change the specificity of the antiporter towards potassium (21).  
98 Even though none of the known targets of c-di-AMP is directly involved in glutamate homeostasis,

99 glutamate is as toxic as potassium to the mutant lacking all diadenylate cyclases that would synthesize c-  
100 di-AMP. This can be explained by the fact that glutamate activates the low-affinity potassium channel  
101 KtrCD by strongly increasing the affinity of this channel. Thus, even the very low potassium  
102 concentration, which must be present even for the growth of this strain, become toxic due to the high  
103 affinity of KtrCD for potassium in the presence of glutamate (22). Accordingly, the  $\Delta dac$  strain lacking c-  
104 di-AMP acquires mutations that reduce potassium uptake if propagated in the presence of glutamate. In  
105 addition, the bacteria usually acquire additional mutations that interfere with glutamate homeostasis by  
106 reducing uptake, facilitating export, or allowing degradation of the amino acid (14).

107 In this study, we were interested in the control of histidine homeostasis. Histidine biosynthesis  
108 from ribose 5-phosphate requires ten enzymes (see [http://subtiwiki.uni-](http://subtiwiki.uni-goettingen.de/v4/category?id=SW.2.3.1.14)  
109 [goettingen.de/v4/category?id=SW.2.3.1.14](http://subtiwiki.uni-goettingen.de/v4/category?id=SW.2.3.1.14); 23). The degradation of histidine to ammonia, glutamate,  
110 and formamide involves a specific transporter, HutM, and four enzymes. The histidine transporter is  
111 induced in the presence of histidine, which is a typical feature for high-affinity transport systems (24,  
112 25). Usually, high-affinity transporters are used for catabolic pathways to use an amino acid as carbon or  
113 nitrogen source. In contrast, constitutively expressed low-affinity transporters are used to import the  
114 amino acid from complex medium for protein biosynthesis. In many cases, both, low- and high-affinity  
115 amino acid transporters, are encoded in the genome of *B. subtilis*, and they are expressed depending on  
116 the physiological conditions. However, no low-affinity histidine transporter has been identified so far.  
117 Histidine degradation yields intracellular glutamate, which is toxic for mutants lacking c-di-AMP (14) due  
118 to the activation of the potassium channel KtrCD (22). We thus expected that the strain lacking c-di-AMP  
119 has a similar sensitivity against histidine as it is against glutamate. We made use of this sensitivity to the  
120 degradation product glutamate to get further insights into the components that contribute to histidine  
121 homeostasis in *B. subtilis*. Our study revealed that mutational activation of an export system is the major  
122 mechanism to achieve resistance to histidine.

123

124 **RESULTS**

125

126 **Histidine is toxic to a *B. subtilis* strain lacking c-di-AMP, and mutations in the *azlB* gene overcome the**  
127 **toxicity.**

128 Some amino acids such as serine and threonine are toxic for *B. subtilis*. In the case of glutamate, toxicity  
129 becomes visible in the absence of a degradation pathway or if the bacteria are unable to form the  
130 second messenger c-di-AMP (14). Here, we tested growth of a wild type strain (168) of *B. subtilis* and of  
131 an isogenic strain that had all three genes encoding diadenylate cyclases deleted ( $\Delta dac$ , GP2222) (21) in  
132 the presence of histidine. As shown in Fig. 1, growth of the *B. subtilis* wild type strain 168 is not affected  
133 by histidine concentrations up to 10 mM. At a higher concentration of 20 mM, growth was inhibited. In  
134 contrast, histidine is highly toxic for *B. subtilis* GP2222 even at very low histidine concentrations (see Fig.  
135 1). We observed that larger colonies rapidly appeared. It is likely that these larger colonies were formed  
136 by suppressor mutants that were resistant to histidine in the medium. We hypothesized that mutations  
137 could affect uptake systems for histidine as already observed for glutamate, serine, or threonine (9, 10,  
138 14). Indeed, we were able to identify mutations in two isolates by whole genome sequencing. However,  
139 to our surprise, the mutations did not cover known or putative amino acid transporters of *B. subtilis* (23).  
140 In contrast, we observed mutations in the *azlB* gene, which encodes a Lrp-type transcription repressor  
141 that controls the expression of a branched chain amino acid exporter (AzlCD) and a branched chain  
142 amino acid importer (BrnQ) (9, 26). Strain GP3638 carried an amino acid substitution in AzlB (Asn24 Ser).  
143 In the second strain, GP3639, we found an eight basepair insertion (CATTAATG) after the 37<sup>th</sup> basepair of  
144 the coding sequence that results in a frameshift and thus prevents the expression of a functional AzlB  
145 protein. As the *azlB* gene seemed to be a hotspot of mutations in histidine-resistant suppressor mutants,  
146 we determined the sequence of this gene in four additional mutants. In each case, mutations were  
147 present in the *azlB* gene, either amino acid substitutions, Asn24 Ser as in GP3638, Ile31 Met, or  
148 frameshift mutations. Since the frameshift mutations prevent the formation of functional AzlB proteins,

149 it seemed likely that the amino acid substitutions also resulted in inactive proteins. Indeed both the N24S  
150 and the I31M mutations affect the DNA-binding helix-turn-helix motif of AzlB.

151 As mentioned above, growth of the wild type strain 168 was inhibited above 20 mM histidine.  
152 Therefore, we tested the growth of our suppressor mutants in the absence and presence of histidine.  
153 While all mutants were viable at 5 mM histidine, they were still inhibited at a concentration of 30 mM  
154 (see Fig. 1). However, when suppressor mutants originally isolated at 15 mM histidine were transferred  
155 to 30 mM histidine, suppressor mutants appeared again. One of these mutants (GP3588) was subjected  
156 to whole genome sequencing. In coherence with our previously isolated mutants, we found a frameshift  
157 mutation in *azlB* highlighting the importance of *azlB* inactivation for the adaptation of the *B. subtilis*  
158 strain lacking c-di-AMP to the presence of histidine. Moreover, we found three additional mutations at a  
159 histidine concentration of 30 mM. Both the main potassium transporter KimA and the KtrD membrane  
160 subunit of the low-affinity potassium channel KtrCD (21, 27) were inactivated due to frameshift  
161 mutations. In addition, the high affinity glutamate transporter GltT (14, 28) carried a substitution of Thr-  
162 342 to a Pro residue. It is known that KtrCD is converted to a high-affinity potassium channel in the  
163 presence of glutamate (22) suggesting that glutamate as the product of histidine utilization causes  
164 activation of KtrCD. Moreover, small amounts of glutamate that are exported from the cell may be re-  
165 imported by GltT thus, again, contributing to the activation of KtrCD. This activation of KtrCD as well as  
166 the activity of KimA contribute to potassium toxicity that can only be bypassed by inactivation of the  
167 major potassium uptake systems.

168 Histidine toxicity in the  $\Delta dac$  mutant GP2222 might be caused by the formation of glutamate  
169 that triggers toxic glutamate accumulation, by toxicity of histidine due to its reactivity itself, or by a  
170 combination of both. The identification of *kimA* and *ktrD* mutants in the suppressor isolated at the  
171 elevated histidine concentration suggests that potassium toxicity really can become a problem for the  
172 bacteria. However, we never identified suppressor mutants that were affected in the histidine  
173 degradaton pathway thus avoiding the problem of intracellular glutamate formation. To test the role of



174 histidine degradation for the acquisition of resistance to histidine, we deleted the *hutH* gene encoding  
175 histidase, the first gene of the catabolic pathway in a wild type and a  $\Delta dac$  mutant strain. The set of four  
176 isogenic strains was tested for growth on minimal medium in the absence of histidine and in the  
177 presence of 5 mM, 15 mM, 25 mM, and 35 mM histidine. While all strains grew well in the absence of  
178 histidine, growth was inhibited at histidine concentrations exceeding 15 mM and 5 mM for the wild type  
179 and the  $\Delta dac$  mutant, respectively. The inactivation of the histidine degradative pathway (*hutH*  
180 mutation) did not affect growth in either of the genetic backgrounds (data not shown). Thus, histidine  
181 seems to inhibit growth of *B. subtilis* by itself, as has also been observed for *E. coli* (29).

182 Taken together, our results demonstrate that the Lrp-type repressor protein AzlB plays a major  
183 role in the adaptation of *B. subtilis* lacking c-di-AMP to high levels of histidine. At even higher  
184 concentration of histidine, the degradation product glutamate induces the uptake of potassium, which is  
185 known to be toxic to strains that are unable to produce c-di-AMP (20, 21, 22).

186

#### 187 **Suppressor mutants exhibit increased expression of the *azlBCD-brnQ* operon.**

188 To test the effect of the *azlB* mutations on the expression of the *azlBCD-brnQ* operon, we analyzed the  
189 transcripts of the operon by a Northern blot analysis. For this purpose, we cultivated the wild type strain  
190 168, the  $\Delta dac$  mutant GP2222 and two suppressor mutants GP3638 (AzlB-Asn24 Ser) and GP3639  
191 (frameshift in AzlB) in MSSM minimal medium, isolated the RNA, and performed Northern blot  
192 experiments using a riboprobe complementary to *azlC* to detect the specific mRNA(s). Based on the  
193 known transcript sizes of the *B. subtilis* glycolytic *gapA* operon (30), we estimated the sizes of the  
194 transcripts of the *azl* operon. As shown in Fig. 2A, expression of the operon could not be detected in the  
195 wild type strain 168 and in the  $\Delta dac$  mutant GP2222. Signals corresponding to transcripts of about 1,100,  
196 1,500, 3,300 and 5,100 nucleotides were only visible in the two suppressor mutants carrying the *azlB*  
197 mutations. This result indicates that only inactive *azlB* allows expression of the *azl* operon and led to high

198 expression levels. The presence of multiple transcripts suggests internal transcription signals and/or  
199 mRNA processing events.

200           So far, the inducer for the *azIBCD-brnQ* operon has not been identified. Since our results indicate  
201 that the operon is involved in the control of the histidine homeostasis, we wanted to test the activity of  
202 the *azIB* promoter under different conditions. For this purpose, we fused the *azIB* promoter region to a  
203 promoterless *lacZ* gene encoding  $\beta$ -galactosidase and integrated this *azIB-lacZ* fusion into the *B. subtilis*  
204 genome. According to a genome-wide transcriptome analysis (31), the promoter of the operon is located  
205 in front of the upstream *yrdF* gene. However, the same study indicated the presence of an mRNA upshift  
206 in front of the *azIB* gene. Therefore, we also constructed and tested an *yrdF-lacZ* fusion. The strains  
207 carrying the *azIB-lacZ* and *yrdF-lacZ* fusions were cultivated in C-Glc minimal medium in the absence or  
208 presence of different amino acids as potential inducers. As shown in Table 1, both the upstream regions  
209 of *yrdF* and *azIB* had only very minor promoter activity. As a control, we used the moderately expressed  
210 promoter of the *pgi* gene encoding phosphoglucose isomerase. This promoter yielded a ten-fold higher  
211  $\beta$ -galactosidase activity as compared to the *yrdF* and *azIB* promoters. In addition, the activity of the *yrdF*  
212 and *azIB* promoters was not induced by any of the tested amino acids, including histidine. Therefore, we  
213 also tested casein hydrolysate, a mixture of amino acids. Again, no induction was observed for both  
214 promoters. However, deletion of the *azIB* gene resulted in an about seven-fold increase of the activity of  
215 the *azIB* promoter (see GP3614 vs. GP3612) whereas the *yrdF* promoter was not affected. Moreover,  
216 GltR, a LysR family transcription factor of so far unknown function, is encoded downstream of the *brnQ*  
217 gene (32). We therefore considered the possibility that GltR might play a role in the control of the *azI*  
218 operon. However, deletion of the *gltR* gene did not affect the activity of the *azIB* promoter.

219           Taken together, our data confirm that AzIB is the transcriptional repressor of the *azI* operon. The  
220 *azIB* gene is the first gene of the operon (see Fig. 2B). Moreover, our results demonstrate that the  
221 transcriptional regulation by AzIB is not affected by any individual amino acid or a mixture of them, even

222 though the operon encodes exporters and importers for amino acids. Only the loss of a functional AzlB  
223 repressor allows the expression of the *azl* operon (see Discussion).

224

225 **Resistance to histidine depends on the AzlCD amino acid exporter.**

226 So far, we have established that the suppressor mutants have mutations in AzlB that increase expression  
227 of the *azl* operon, which confers resistance to histidine. In addition to the promoter-proximal repressor  
228 gene *azlB*, this operon encodes the AzlC and AzlD subunits of a bipartite amino acid exporter and the  
229 branched-chain amino acid transporter BrnQ as well as the YrdK protein of unknown function and the  
230 putative 4-oxalocrotonate tautomerase YrdN. Since overexpression of AzlCD was also responsible for the  
231 resistance of *B. subtilis* to azaleucine (26), it seemed most plausible that this transporter is also involved  
232 in histidine resistance. To test this hypothesis, we constructed two sets of isogenic strains that differed in  
233 the *azl* operon in the background of the wildtype 168 and in the background of the  $\Delta dac$  mutant  
234 GP2222. First, we compared growth of the wild type, the *azlB* mutant GP3600, and the *azlBCD* mutant  
235 GP3601. As shown in Fig. 3A, the wild type strain was sensitive to the presence of 15 mM histidine in the  
236 medium, whereas the isogenic *azlB* mutant that exhibits overexpression of AzlCD was resistant.  
237 However, the additional deletion of the *azlCD* genes in GP3601 restored the sensitivity to histidine,  
238 indicating that the increased expression of the AzlCD amino acid exporter is responsible for the acquired  
239 resistance to histidine. Similar results were obtained for the set of strains that are unable to synthesize  
240 c-di-AMP ( $\Delta dac$ , Fig. 3B). Again, the strain lacking AzlB (GP3607) was resistant to high levels of histidine  
241 (20 mM), whereas the strain lacking the amino acid exporter AzlCD in addition to AzlB (GP3606) was as  
242 sensitive as the  $\Delta dac$  mutant (GP2222) even at 5 mM histidine. Ectopic expression of the *azlCD* genes  
243 under the control of the constitutive *degQ36* promoter (33) in strain GP3642 that lacks the endogenous  
244 *azlBCD* operon partially restored the resistance to histidine up to a concentration of 5 mM. In contrast,  
245 expression of the AzlC component of the bipartite exporter alone had no effect (Fig. 3B, GP3643). Taken  
246 together, these data strongly suggest that the overexpression of the two-component amino acid

247 exporter AzlCD as a result of the inactivation of AzlB is required for the resistance of *B. subtilis* to  
248 histidine.

249

### 250 **Overexpression of AzlCD results in enhanced histidine export.**

251 AzlCD has previously been identified as an exporter for 4-azaleucine and was hypothesized to be an  
252 exporter for other branched chain amino acids (26). Our data suggest that the complex might also export  
253 histidine thus contributing to histidine resistance upon overexpression. To test this idea, we determined  
254 the relative intra- and extracellular histidine concentrations in the wild type strain 168, as well as in the  
255 isogenic *azlB*, *azlBCD*, and *azlCD* deletion mutants GP3600, GP3601, and GP3622, respectively, during  
256 growth in MSSM minimal medium. In this condition, *de novo* histidine biosynthesis is active, because  
257 MSSM minimal medium does not contain amino acids. Compared to the wild type, intracellular histidine  
258 levels decreased in the *azlB* mutant GP3600, thus confirming that higher AzlCD levels in this strain led to  
259 histidine export (Fig. 4A). Mutants lacking the amino acid exporter AzlCD had wild type-like histidine  
260 levels (Fig. 4A). In contrast, the extracellular histidine concentration was threefold higher in the *azlB*  
261 mutant whereas the strains lacking AzlCD have extracellular histidine levels that were comparable to the  
262 wild type strain (Fig 4 B). These results demonstrate that AzlCD which is overexpressed as a result of the  
263 *azlB* mutation, is involved in the control of histidine homeostasis. While the loss of AzlCD has no effect,  
264 which corresponds to the lack of expression in the wild type strain, its overexpression results in reduced  
265 and increased intra- and extracellular histidine levels, respectively. This suggests that AzlCD is an active  
266 histidine exporter.

267

### 268 **DISCUSSION**

269

270 The results presented in this study demonstrate that histidine inhibits growth of *B. subtilis* as has already  
271 been shown for serine or threonine (10, 34, 35). Amino acid toxicity is often enhanced if *B. subtilis* is

272 unable to produce the essential second messenger nucleotide c-di-AMP due to the activation of the  
273 potassium channel KtrCD by glutamate, the degradation product of many amino acids (14, 22). This work  
274 shows that the increased sensitivity of a strain lacking c-di-AMP to amino acids is also valid for histidine.

275 Typically, suppressor screens using toxic amino acids, amino acids analogs or related anti-  
276 metabolites result in the identification of transporters, which have been inactivated in the suppressor  
277 mutants (9, 10, 11, 12, 13, 14, 15). While this is the predominant type of suppressor mutations,  
278 resistance to toxic amino acids and related molecules can also be achieved by the activation of  
279 degradation pathways (10, 14), by the activation of export mechanisms (14, 26), or by modifying the  
280 target protein/ pathway in a way that it becomes insensitive to the presence of the otherwise toxic  
281 molecule. This was observed for glyphosate resistance in *Salmonella typhimurium*, which can be  
282 achieved by mutations that render the target enzyme 5-enolpyruvyl-shikimate-3-phosphate (EPSP)  
283 synthase insensitive to inhibition (18) as well as for serine toxicity in *B. subtilis*, which could be overcome  
284 by increased expression of the genes encoding the threonine biosynthetic pathway (10). Studies about  
285 histidine toxicity in *E. coli* revealed that the amino acid enhances oxidative DNA damage (29). Thus one  
286 might also expect suppressor mutations that prevent DNA damage. The exclusive isolation of *azlB*  
287 mutations that activate the expression of the AzlCD amino acid exporter suggests that all other  
288 mechanisms of suppression are beyond reach for the *B. subtilis* cell.

289 The fact that we were unable to isolate a single suppressor mutant that had lost histidine uptake  
290 strongly suggests that *B. subtilis* possesses multiple histidine transporters. So far, only the HutM histidine  
291 transporter has been identified based on its similarity to known histidine transporters (25). However, the  
292 expression of the *hutM* gene in the *hut* operon for histidine utilization as well as the induction of its  
293 expression by histidine suggest that HutM is a high-affinity transporter that is probably not involved in  
294 histidine uptake under standard conditions. It is thus tempting to speculate that the genome of *B. subtilis*  
295 encodes one or more low-affinity transporters for histidine. Indeed, *B. subtilis* encodes several homologs  
296 of the *Pseudomonas putida* histidine transporter HutT (36). These transporters all belong to the amino

297 acid-polyamine-organocation (APC) superfamily of amino acid transporters. Four of them (AapA, AlaP,  
298 YbxG, and YdgF) share more than 40% sequence identity with *P. putida* HutT, suggesting that these  
299 proteins have the same biological activity. Thus, the presence of multiple histidine uptake systems would  
300 prevent the rapid simultaneous inactivation of all these systems in suppressor mutants thus explaining  
301 that no transporter mutants were isolated.

302 Our data clearly demonstrate that the bipartite amino acid transporter AzlCD exports not only  
303 the leucine analog 4-azaleucine (16), but also histidine. Corresponding bipartite systems that mediate  
304 the export of branched-chain amino acids have also been identified in *E. coli* and *Corynebacterium*  
305 *glutamicum* (37, 38). These exporters are members of the LIV-E class of transport proteins (38, 39). As in  
306 *B. subtilis*, these systems consist of a large (corresponding to AzlC) and a small subunit (corresponding to  
307 AzlD). While proteins homologous to AzlC are abundant in a wide range of bacteria, including most  
308 Actinobacteria and Firmicutes as well as many Proteobacteria, AzlD is conserved only in few bacteria.  
309 The other bacteria that possess a homolog of AzlC obviously have alternative small subunits. This is the  
310 case in *E. coli*, where the small YgaH subunit of the YgaZ/YgaH valine exporter is not similar to its  
311 counterparts in *B. subtilis* and *C. glutamicum*. We have also considered the possibility that the large  
312 subunit AzlC might be sufficient for histidine export; however, this is not the case (see Fig. 3B).

313 It is interesting to note that the AzlCD amino acid exporter is able to export multiple amino acids.  
314 Substrate promiscuity is a common feature in amino acid transport. In *B. subtilis*, the low affinity  
315 transporter AimA is the major transporter for glutamate and serine (10, 14). Similarly, the BcaP  
316 permease transports branched-chain amino acids, threonine and serine (9, 10, 11) and the GltT protein is  
317 involved in the uptake of aspartate, glutamate, and the antimetabolite glyphosate (14, 15, 28). Thus,  
318 AzlCD is another example for the weak substrate specificity of amino acid transporters. It is tempting to  
319 speculate that AzlCD might be involved in the export of even other amino acids and related metabolites  
320 in *B. subtilis*.

321           Based on the chemical properties of each amino acid, it may be generally toxic, or only under  
322 specific conditions. Therefore, cells often have efficient degradation pathways to remove toxic  
323 compounds. This is the case for glutamate which is degraded by the glutamate dehydrogenases GudB or  
324 RocG (7, 17). However, other amino acids become toxic only at very high concentrations or in very  
325 particular mutant backgrounds. This is the case for histidine which is toxic only at high concentrations for  
326 the *B. subtilis* wild type strain but already at low concentrations in a strain unable to form c-di-AMP.  
327 Similarly, the presence of amino acid analogs such as 4-azaleucine might be a rather exceptional event in  
328 natural environments. Still, *B. subtilis* is equipped to meet this challenge using the amino acid exporter  
329 AzlCD. Based on a global transcriptome analysis, the *azl* operon is barely expressed under a wide range  
330 of conditions, and no conditions that results in induction of the operon could be detected (26, 31).  
331 Similarly, the putative arginine and lysine exporter YisU is not expressed under any of 104 studied  
332 conditions (31). The observation that the expression of the *azl* operon in the presence of toxic  
333 concentrations of histidine or 4-azaleucine is obviously not sufficient to provide resistance against these  
334 amino acids already suggested that none of these compounds acts as a molecular inducer for the *azl*  
335 operon. In agreement with previous results (26), we observed substantial expression of the operon only  
336 if the *azlB* gene encoding the repressor of the operon was deleted or inactivated due to the suppressor  
337 mutations. Even the presence of a mixture of amino acids derived from casamino acids did not result in  
338 the induction of the operon. As the functions of the operon seem to be related to amino acid export  
339 (AzlCD) and uptake (BrnQ), regulation by amino acid availability seemed to be most likely. However, the  
340 results from prior global and operon-specific transcription studies as well as our data suggest that the  
341 activity of AzlB is not controlled by amino acids even though the protein belongs to Lrp family of leucine-  
342 responsive regulatory proteins (40). It is tempting to speculate that AzlB has lost the ability to interact  
343 with amino acid-related effector molecules, but that expression of the operon can rapidly be activated  
344 by the acquisition of mutations that inactivate AzlB. Alternatively, AzlB might respond to a yet unknown  
345 signal and then allow induction of the operon. The mutational inactivation of a normally silent operon

346 has also been described for the cryptic *E. coli bgl* operon for the utilization of  $\beta$ -glucosides which requires  
347 insertion of the mobile element IS5 in the promoter region to get expressed (41).

348 Due to its strongly increased sensitivity to several amino acids, the *B. subtilis* mutant lacking c-di-  
349 AMP is an excellent tool to study mechanisms of amino acid homeostasis, and to identify uptake and  
350 export systems. This endeavour is required as the details of amino acid transports are one of the few  
351 areas, which has several gaps of knowledge in the research on *B. subtilis* (3). We anticipate that the  
352 further use of the c-di-AMP lacking mutant will continue to help filling these remaining gaps.

353

## 354 **MATERIALS AND METHODS**

355

### 356 **Strains, media and growth conditions.**

357 *E. coli* DH5 $\alpha$  (42) was used for cloning. All *B. subtilis* strains used in this study are derivatives of the  
358 laboratory strain 168. They are listed in Table 2. *B. subtilis* and *E. coli* were grown in Luria-Bertani (LB) or  
359 in sporulation (SP) medium (42, 43). For growth assays, *B. subtilis* was cultivated in MSSM medium (21).  
360 MSSM is a modified SM medium in which KH<sub>2</sub>PO<sub>4</sub> was replaced by NaH<sub>2</sub>PO<sub>4</sub> and KCl was added as  
361 indicated (21). The media were supplemented with ampicillin (100  $\mu$ g/ml), kanamycin (10  $\mu$ g/ml),  
362 chloramphenicol (5  $\mu$ g/ml), spectinomycin (150  $\mu$ g/ml), tetracycline (12.5  $\mu$ g/ml) or erythromycin and  
363 lincomycin (2 and 25  $\mu$ g/ml, respectively) if required.

364

### 365 **DNA manipulation and transformation.**

366 All commercially available restriction enzymes, T4 DNA ligase and DNA polymerases were used as  
367 recommended by the manufacturers. DNA fragments were purified using the QIAquick PCR Purification  
368 Kit (Qiagen, Hilden, Germany). DNA sequences were determined by the dideoxy chain termination  
369 method (42). Standard procedures were used to transform *E. coli* (42), and transformants were selected  
370 on LB plates containing ampicillin (100  $\mu$ g/ml). *B. subtilis* was transformed with plasmid or chromosomal



371 DNA according to the two-step protocol described previously (43). Transformants were selected on SP  
372 plates containing chloramphenicol (Cm 5 µg/ml), kanamycin (Km 10 µg/ml), spectinomycin (Spc 150  
373 µg/ml), tetracycline (Tet 12,5 µg/ml) or erythromycin plus lincomycin (Em 2 µg/ml and Lin 25 µg/ml).

374

#### 375 **Genome sequencing.**

376 To identify the mutations in the suppressor mutant strains GP3588, GP3638, and GP3639 (see Table 2),  
377 the genomic DNA was subjected to whole-genome sequencing. Concentration and purity of the isolated  
378 DNA was first checked with a Nanodrop ND-1000 (PqLab Erlangen, Germany), and the precise  
379 concentration was determined using the Qubit® dsDNA HS Assay Kit as recommended by the  
380 manufacturer (Life Technologies GmbH, Darmstadt, Germany). Illumina shotgun libraries were prepared  
381 using the Nextera XT DNA Sample Preparation Kit and subsequently sequenced on a MiSeq system with  
382 the reagent kit v3 with 600 cycles (Illumina, San Diego, CA, USA) as recommended by the manufacturer.  
383 The reads were mapped on the reference genome of *B. subtilis* 168 (GenBank accession number:  
384 NC\_000964) (44). Mapping of the reads was performed using the Geneious software package  
385 (Biomatters Ltd., New Zealand) (45). Frequently occurring hitchhiker mutations (46) and silent mutations  
386 were omitted from the screen. The resulting genome sequences were compared to that of our in-house  
387 wild type strain. Single nucleotide polymorphisms were considered as significant when the total  
388 coverage depth exceeded 25 reads with a variant frequency of ≥90%. All identified mutations were  
389 verified by PCR amplification and Sanger sequencing.

390

#### 391 **Construction of mutant strains by allelic replacement.**

392 Deletion of the *azlB*, *azlBCD*, *azlCD*, *disA*, *gltR*, and *hutH* genes was achieved by transformation of *B.*  
393 *subtilis* 168 with PCR product constructed using oligonucleotides to amplify DNA fragments flanking the  
394 target genes and an appropriate intervening resistance cassette as described previously (47). The  
395 integrity of the regions flanking the integrated resistance cassette was verified by sequencing PCR

396 products of about 1,100 bp amplified from chromosomal DNA of the resulting mutant strains. In the case  
397 of the *azlB*, *azlCD*, and *azlBCD* deletions, the cassette carrying the resistance gene lacked a transcription  
398 terminator to ensure the expression of the downstream genes.

399

#### 400 **Phenotypic analysis.**

401 In *B. subtilis*, amylase activity was detected after growth on plates containing nutrient broth (7.5 g/l), 17  
402 g Bacto agar/l (Difco) and 5 g hydrolyzed starch/l (Connaught). Starch degradation was detected by  
403 sublimating iodine onto the plates.

404 Quantitative studies of *lacZ* expression in *B. subtilis* were performed as follows: cells were grown  
405 in MSSM medium supplemented with KCl at different concentrations as indicated. Cells were harvested  
406 at OD<sub>600</sub> of 0.5 to 0.8.  $\beta$ -Galactosidase specific activities were determined with cell extracts obtained by  
407 lysozyme treatment as described previously (43). One unit of  $\beta$ -galactosidase is defined as the amount of  
408 enzyme which produces 1 nmol of o-nitrophenol per min at 28° C.

409 To assay growth of *B. subtilis* mutants at different histidine concentrations, a drop dilution assay  
410 was performed. Briefly, precultures in MSSM medium at the indicated histidine concentration were  
411 washed three times, resuspended to an OD<sub>600</sub> of 1.0 in MSSM basal salts solution. Dilution series were  
412 then pipetted onto MSSM plates containing the desired histidine concentration.

413

#### 414 **Plasmid constructions.**

415 Plasmid pAC7 (48) was used to construct translational fusions of the potential *yrdF* and *azlB* promoter  
416 regions to the promoterless *lacZ* gene. For this purpose, the promoter regions were amplified using  
417 oligonucleotides that attached EcoRI and BamHI restriction to the ends of the products. The fragments  
418 were cloned between the EcoRI and BamHI sites of pAC7. The resulting plasmids were pGP3807 and  
419 pGP3808 for *yrdF* and *azlB*, respectively.

420 To allow ectopic expression of the *azlC* and *azlCD* genes, we constructed the plasmids pGP3811  
421 and pGP3812, respectively. The corresponding genes were amplified using oligonucleotides that added  
422 BamHI and PstI sites to the ends of the fragments and cloned into the integrative expression vector  
423 pGP1460 (49) linearized with the same enzymes.

424

#### 425 **Northern blot analysis.**

426 The strains *B. subtilis* 168 (wild type) and GP2222 ( $\Delta dac$  mutant) as well as the suppressor mutants  
427 GP3638 and GP3639 were grown in MSSM minimal medium and harvested in the late logarithmic phase.  
428 The preparation of total RNA and Northern blot analysis were carried out as described previously (50,  
429 51). Digoxigenin (DIG) RNA probes were obtained by *in vitro* transcription with T7 RNA polymerase  
430 (Roche Diagnostics) using PCR-generated DNA fragments as templates. The reverse primer contained a  
431 T7 RNA polymerase recognition sequence. *In vitro* RNA labelling, hybridization and signal detection were  
432 carried out according to the instructions of the manufacturer (DIG RNA labelling kit and detection  
433 chemicals; Roche Diagnostics).

434

#### 435 **Determination of intra- and extracellular histidine pools.**

436 For the determination of histidine levels of *B. subtilis*, cells were cultivated in MSSM minimal medium  
437 until exponential growth phase ( $OD_{600}$  of 0.4). For the extraction of intracellular metabolites, 4 ml of each  
438 culture were harvested by filtration (52). Histidine levels were then determined as described previously  
439 (53) using  $^{13}C$  labelled histidine from an *E. coli* extract as internal standard. Briefly, an Agilent 1290  
440 Infinity II UHPLC system (Agilent Technologies) was used for liquid chromatography. The column was an  
441 Acquity BEH Amide 30 x 2.1 mm with 1.7  $\mu m$  particle size (Waters GmbH). The temperature of the  
442 column oven was 30°C, and the injection volume was 3  $\mu l$ . LC solvent A was: water with 10 mM  
443 ammonium formate and 0.1 % formic acid (v/v), and LC solvent B was: acetonitrile with 0.1 % formic acid  
444 (v/v). The gradient was: 0 min 90% B; 1.3 min 40 % B; 1.5 min 40 % B; 1.7 min 90 % B; 2 min 90 % B; 2.75

445 min 90% B. The flow rate was 0.4 ml min<sup>-1</sup>. From minute 1 to 2, the sample was injected to the MS. An  
446 Agilent 6495 triple quadrupole mass spectrometer (Agilent Technologies) was used for mass  
447 spectrometry. Source gas temperature was set to 200°C, with 14 l min<sup>-1</sup> drying gas and a nebulizer  
448 pressure of 24 psi. Sheath gas temperature was set to 300°C and flow to 11 l min<sup>-1</sup>. Electrospray nozzle  
449 and capillary voltages were set to 500 and 2500 V, respectively. Isotope-ratio mass spectrometry with <sup>13</sup>C  
450 internal standard was used to obtain relative data. Fully <sup>12</sup>C- and <sup>13</sup>C-labelled histidine was measured by  
451 multiple reaction monitoring in positive ionization mode using a collision energy of 13 eV. Precursor ion  
452 masses were 156 Da and 162 Da, product ion masses 110 Da and 115 Da for <sup>12</sup>C- and <sup>13</sup>C-histidine,  
453 respectively. Ratios between <sup>12</sup>C- and <sup>13</sup>C-labelled histidine were normalized to the ODs and the median  
454 ratio of the control strain 168.

455

#### 456 **ACKNOWLEDGEMENTS**

457 This work was supported by a grant of the Deutsche Forschungsgemeinschaft (DFG) within the Priority  
458 Program SPP1879 (Stu 214-16) (to J.S.). H.L. and T.S. acknowledge funding from the Cluster of Excellence  
459 EXC 2124 from the Deutsche Forschungsgemeinschaft. The funders had no role in study design, data  
460 collection, analysis and interpretation, decision to submit the work for publication, or preparation of the  
461 manuscript. Anja Poehlein und Rolf Daniel are acknowledged for the genome sequencing.

462 *Author contributions:* Design of the study: J.M. and J.S. Experimental work: J.M., T.S., B.M.H., and K.S.

463 Data analysis: J.M., T.S., H.L. and J.S. Wrote the paper: J.M. and J.S.

464

465

#### 466 **REFERENCES**

467

468 1. De Lorenzo V, Sekowska A, Danchin A. 2015. Chemical reactivity drives spatiotemporal  
469 organization of bacterial metabolism. *FEMS Microbiol Rev* 39:96-119.

- 470 2. Commichau FM, Pietack FM, Stülke J. 2013. Essential genes in *Bacillus subtilis*: a re-evaluation  
471 after ten years. *Mol Biosyst* 9:1068-1075.
- 472 3. Reuß DR, Commichau FM, Gundlach J, Zhu B, Stülke J. 2016. The blueprint of a minimal cell:  
473 MiniBacillus. *Microbiol Mol Biol Rev* 80:955-987.
- 474 4. Aguilar Suárez R, Stülke J, van Dijl JM. 2019. Less is more: toward a genome-reduced *Bacillus* cell  
475 factory for “difficult proteins”. *ACS Synth Biol* 8:99-108.
- 476 5. Van Tilburg AY, van Heel AJ, Stülke J, de Kok NAW, Rueff AS, Kuipers OP. 2020. MiniBacillus PG10  
477 as a convenient and effective production host for lantibiotics. *ACS Synth Biol* 9:1833-1842.
- 478 6. Michalik S, Reder A, Richts B, Faßhauer P, Mäder U, Pedreira T, Poehlein A, van Heel AJ, van  
479 Tilburg AY, Altenbuchner J, Klewing A, Reuß DR, Daniel R, Commichau FM, Kuipers OP, Hamoen  
480 LW, Völker U, Stülke J. 2021. The *Bacillus subtilis* minimal genome compendium. *ACS Synth Biol*  
481 10:2767-2771.
- 482 7. Commichau FM, Gunka K, Landmann JJ, Stülke J. 2008. Glutamate metabolism in *Bacillus subtilis*:  
483 gene expression and enzyme activities evolved to avoid futile cycles and to allow rapid responses  
484 to perturbations of the system. *J Bacteriol* 190:3557-3564.
- 485 8. Gunka K, Tholen S, Gerwig J, Herzberg C, Stülke J, Commichau FM. 2012. A high-frequency  
486 mutation in *Bacillus subtilis*: requirements for the decryptification of the *gudB* glutamate  
487 dehydrogenase gene. *J Bacteriol* 194:1036-1044.
- 488 9. Belitsky BR. 2015. Role of branched-chain amino acid transport in *Bacillus subtilis* CodY activity. *J*  
489 *Bacteriol* 197:1330-1338.
- 490 10. Klewing A, Koo BM, Krüger L, Poehlein A, Reuß D, Daniel R, Gross CA, Stülke J. 2020. Resistance  
491 to serine in *Bacillus subtilis*: identification of the serine transporter YbeC and of a metabolic  
492 network that links serine and threonine metabolism. *Environ Microbiol*. 22:3937-3949.

- 493 11. Commichau FM, Alzinger A, Sande R, Bretzel W, Reuß DR, Dormeyer M, Chevreux B, Schuldes J,  
494 Daniel R, Akeroyd M, Wyss M, Hohmann HP, Prágai Z. 2015. Engineering *Bacillus subtilis* for the  
495 conversion of the antimetabolite 4-hydroxy-L-threonine to pyridoxine. *Metab Eng* 29:196-207.
- 496 12. Zapras A, Hoffmann T, Stannek L, Gunka K, Commichau FM, Bremer E. 2014. The  $\gamma$ -  
497 aminobutyrate permease GabP serves as the third proline transporter of *Bacillus subtilis*. *J*  
498 *Bacteriol* 196:515-526.
- 499 13. Sidiq KR, Chow MW, Zhao Z, Daniel RA. 2021. Alanine metabolism in *Bacillus subtilis*. *Mol*  
500 *Microbiol* 115:739-757.
- 501 14. Krüger L, Herzberg C, Rath H, Pedreira P, Ischebeck T, Poehlein A, Gundlach J, Daniel R, Völker U,  
502 Mäder U, Stülke J. 2021. Essentiality of c-di-AMP in *Bacillus subtilis*: bypassing mutations  
503 converge in potassium and glutamate homeostasis. *PLoS Genet* 17:e1009092.
- 504 15. Wicke D, Schulz LM, Lentjes S, Scholz P, Poehlein A, Gibhardt J, Daniel R, Ischebeck T, Commichau  
505 FM. 2019. Identification of the first glyphosate transporter by genomic adaptation. *Environ*  
506 *Microbiol*. 21:1287-1305.
- 507 16. Ward JB, Zahler SA. 1973. Regulation of leucine biosynthesis in *Bacillus subtilis*. *J Bacteriol*  
508 116:727-735.
- 509 17. Belitsky BR, Sonenshein AL. 1998. Role and regulation of *Bacillus subtilis* glutamate  
510 dehydrogenase genes. *J Bacteriol* 180:6298-6305.
- 511 18. Comai L, Sen LC, Stalker DM. 1983. An altered *aroA* gene product confers resistance to the  
512 herbicide glyphosate. *Science* 221:370-371.
- 513 19. Stülke J, Krüger L. 2020. Cyclic di-AMP signaling in bacteria. *Annu Rev Microbiol* 74:159-179.
- 514 20. Gundlach J, Krüger L, Herzberg C, Turdiev A, Poehlein A, Tascón I, Weiß M, Hertel D, Daniel R,  
515 Hänelt I, Lee VT, Stülke J. 2019. Sustained sensing in potassium homeostasis: Cyclic di-AMP  
516 controls potassium uptake by KimA at the levels of expression and activity. *J Biol Chem* 294:9605-  
517 9614.

- 518 21. Gundlach J, Herzberg C, Kaever V, Gunka K, Hoffmann T, Weiß M, Gibhardt J, Thürmer A, Hertel  
519 D, Daniel R, Bremer E, Commichau FM, Stülke J. 2017. Control of potassium homeostasis is an  
520 essential function of the second messenger cyclic di-AMP in *Bacillus subtilis*. *Sci Signal* 10:  
521 eaal3011.
- 522 22. Krüger L, Herzberg C, Warneke R, Poehlein A, Stautz J, Weiß M, Daniel R, Hänelt I, Stülke J. 2020.  
523 Two ways to convert a low affinity potassium channel to high affinity: control of *Bacillus subtilis*  
524 KtrDC by glutamate. *J Bacteriol* 202:e00138-20.
- 525 23. Pedreira T, Efmann C, Stülke J. 2022. The current state of *SubtiWiki*, the database for the model  
526 organism *Bacillus subtilis*. *Nucleic Acids Res* 50:D875-D882.
- 527 24. Wray LV, Fisher SH. 1994. Analysis of *Bacillus subtilis hut* operon expression indicates that  
528 histidine-dependent induction is mediated primarily by transcriptional antitermination and that  
529 amino acid repression is mediated by two mechanisms: regulation of transcription initiation and  
530 inhibition of histidine transport. *J Bacteriol* 176:5466-5473.
- 531 25. Bender RA. 2012. Regulation of the histidine utilization (*hut*) system in bacteria. *Microbiol Mol*  
532 *Biol Rev* 76:565-584.
- 533 26. Belitsky BR, Gustafsson MCU, Sonenshein AL, von Wachenfeldt C. 1997. An *Irp*-like gene of  
534 *Bacillus subtilis* involved in branched-chain amino acid transport. *J Bacteriol* 176:5466-5473.
- 535 27. Holtmann G, Bakker EP, Uozumi N, Bremer E. 2003. KtrAB and KtrCD: two K<sup>+</sup> uptake systems in  
536 *Bacillus subtilis* and their role in adaptation to hypertonicity. *J Bacteriol* 185:1289-1298.
- 537 28. Zaprasis A, Bleisteiner M, Kerres A, Hoffmann T, Bremer E. 2015. Uptake of amino acids and their  
538 metabolic conversion into the compatible solute proline confers osmoprotection to *Bacillus*  
539 *subtilis*. *Appl Environ Microbiol* 81:250-259.
- 540 29. Nagao T, Nakayama-Imaohji H, Elahi M, Tada A, Toyonaga E, Yamasaki H, Okazaki K, Miyoshi H,  
541 Tsuchiya K, Kuwahara T. 2018. L-histidine augments the oxidative damage against Gram-negative  
542 bacteria by hydrogen peroxide. *Int J Mol Sci* 41:2847-2854.

- 543 30. Meinken C, Blencke HM, Ludwig H, Stülke J. 2003. Expression of the glycolytic *gapA* operon in  
544 *Bacillus subtilis*: differential syntheses of proteins encoded by the operon. *Microbiology* 149:751-  
545 761.
- 546 31. Nicolas P, Mäder U, Dervyn E, Rochat T, Leduc A, Pigeonneau N, Bidnenko E, Marchadier E,  
547 Hoebeke M, Aymerich S, Becher D, Bisicchia P, Botella E, Delumeau O, Doherty G, Denham EL,  
548 Fogg MJ, Fromion V, Goelzer A, Hansen A, Härtig E, Harwood CR, Homuth G, Jarmer H, Jules M,  
549 Klipp E, Chat LL, Lecointe F, Lewis P, Liebermeister W, March A, Mars RAT, Nannapaneni P,  
550 Noone D, Pohl S, Rinn B, Rügheimer F, Sappa PK, Samson F, Schaffer M, Schwikowski B, Steil L,  
551 Stülke J, Wiegert T, Devine KM, Wilkinson AJ, Dijn JM van, Hecker M, Völker U, Bessières P, Noirot  
552 P. 2012. Condition-dependent transcriptome reveals high-level regulatory architecture in *Bacillus*  
553 *subtilis*. *Science* 335:1103–1106.
- 554 32. Belitsky BR, Sonenshein AL. 1997. Altered transcription activation specificity of a mutant form of  
555 *Bacillus subtilis* GltR, a LysR family member. *J Bacteriol* 179:1035-1043.
- 556 33. Martin-Verstraete I, Débarbouillé M, Klier A, Rapoport G. 1994. Interactions of wild-type and  
557 truncated LevR of *Bacillus subtilis* with the upstream activating sequence of the levanase operon.  
558 *J Mol Biol* 241:178-192.
- 559 34. Lachowicz TM, Morzejko E, Panek E, Piątkowski J. 1996. Inhibitory action of serine on growth of  
560 bacteria of the genus *Bacillus* on mineral synthetic media. *Folia Microbiol* 41:21-25.
- 561 35. Lamb DH, Bott KF. 1979. Inhibition of *Bacillus subtilis* growth and sporulation by threonine. *J*  
562 *Bacteriol* 137:213-220.
- 563 36. Wirtz L, Eder M, Brand AK, Jung H. 2021. HutT functions as the major L-histidine transporter in  
564 *Pseudomonas putida* KT2440. *FEBS Lett* 595:2113-2126.
- 565 37. Park JH, Lee KH, Kim TY, Lee SY. 2007. Metabolic engineering of *Escherichia coli* for the  
566 production of L-valine based on transcriptome and in silico knockout simulation. *Proc Natl Acad*  
567 *Sci U S A* 104:7797-7802.



- 568 38. Kennerknecht N, Sahm H, Yen MR, Patek M, Saier MH, Eggeling L. 2002. Export of L-isoleucine  
569 from *Corynebacterium glutamicum*: a two-gene-encoded member of a new translocator family. *J*  
570 *Bacteriol* 184:3947-3956.
- 571 39. Eggeling L, Sahm H. 2003. New ubiquitous translocators: amino acid export by *Corynebacterium*  
572 *glutamicum* and *Escherichia coli*. *Arch Microbiol* 180:155-160.
- 573 40. Brinkman AB, Ettema TJG, de Vos WM, van der Oost J. 2003. The Lrp family of transcriptional  
574 regulators. *Mol Microbiol* 48:287-294.
- 575 41. Schnetz K, Rak B. IS5: a mobile enhancer of transcription in *Escherichia coli*. *Proc Natl Acad Sci U*  
576 *S A* 89:1244-1248.
- 577 42. Sambrook J, Fritsch EF, Maniatis T. 1989. Molecular cloning: a laboratory manual, 2nd ed. Cold  
578 Spring Harbor Laboratory, Cold Spring Harbor, N.Y.
- 579 43. Kunst F, Rapoport G. 1995. Salt stress is an environmental signal affecting degradative enzyme  
580 synthesis in *Bacillus subtilis*. *J Bacteriol* 177:2403-2407.
- 581 44. Barbe V, Cruveiller S, Kunst F, Lenoble P, Meurice G, Sekowska A, Vallenet D, Wang T, Moszer I,  
582 Médigue C, Danchin A. 2009. From a consortium sequence to a unified sequence: the *Bacillus*  
583 *subtilis* 168 reference genome a decade later. *Microbiology* 155:1758-1775.
- 584 45. Kearse M, Moir R, Wilson A, Stones-Havas S, Cheung M, Sturrock S, Buxton S, Cooper A,  
585 Markowitz S, Duran C, Thierer T, Ashton B, Meintjes P, Drummond A. 2012. Geneious basic: an  
586 integrated and extendable desktop software platform for the organization and analysis of  
587 sequence data. *Bioinformatics* 28:1647-1649.
- 588 46. Reuß DR, Faßhauer P, Mroch PJ, Ul-Haq I, Koo BM, Pöhlein A, Gross CA, Daniel R, Brantl S, Stülke  
589 J. 2019. Topoisomerase IV can functionally replace all type 1A topoisomerases in *Bacillus subtilis*.  
590 *Nucleic Acids Res* 47:5231-5242.

- 591 47. Diethmaier C, Newman JA, Kovács AT, Kaefer V, Herzberg C, Rodrigues C, Boonstra M, Kuipers  
592 OP, Lewis RJ, Stülke J. 2014. The YmdB phosphodiesterase is a global regulator of late adaptive  
593 responses in *Bacillus subtilis*. *J Bacteriol* 196:265-275.
- 594 48. Weinrauch Y, Msadek T, Kunst F, Dubnau D. 1991. Sequence and properties of *comQ*, a new  
595 competence regulatory gene of *Bacillus subtilis*. *J Bacteriol* 173:5685-5693.
- 596 49. Mehne FMP, Gunka K, Eilers H, Herzberg C, Kaefer V, Stülke J. 2013. Cyclic di-AMP homeostasis  
597 in *Bacillus subtilis*: both lack and high level accumulation of the nucleotide are detrimental for  
598 cell growth. *J Biol Chem* 288:2004-2017.
- 599 50. Schilling O, Frick O, Herzberg C, Ehrenreich A, Heinzle E, Wittmann C, Stülke J. 2007.  
600 Transcriptional and metabolic responses of *Bacillus subtilis* to the availability of organic acids:  
601 transcription regulation is important but not sufficient to account for metabolic adaptation. *Appl*  
602 *Environ Microbiol* 73:499-507.
- 603 51. Ludwig H, Meinken C, Matin A, Stülke J. 2002. Insufficient expression of the *ilv-leu* operon  
604 encoding enzymes of branched-chain amino acid biosynthesis limits growth of a *Bacillus subtilis*  
605 *ccpA* mutant. *J Bacteriol* 184:5174-5178.
- 606 52. Kohlstedt M, Sappa PK, Meyer H, Maaß S, Zapras A, Hoffmann T, Becker J, Steil L, Hecker M,  
607 van Dijk JM, Lalk M, Mäder U, Stülke J, Bremer E, Völker U, Wittmann C. 2014. Adaptation of  
608 *Bacillus subtilis* carbon core metabolism to simultaneous nutrient limitation and osmotic  
609 challenge: a multi-omics perspective. *Environ Microbiol* 16:1898-1917.
- 610 53. Guder JC, Schramm T, Sander T, Link H. 2017. Time-optimized isotope ratio LC-MS/MS for high-  
611 throughput quantification of primary metabolites. *Anal Chem* 89:1624-1631.
- 612 54. Ludwig H, Homuth G, Schmalisch M, Dyka FM, Hecker M, Stülke J. 2001. Transcription of  
613 glycolytic genes and operons in *Bacillus subtilis*: evidence for the presence of multiple levels of  
614 control of the *gapA* operon. *Mol Microbiol* 41:409-422.
- 615



617 **Table 1.** Activity of the *azlB* promoter

| Strain | Relevant genotype                     | Units of $\beta$ -galactosidase per $\mu$ g of protein |             |             |             |             |
|--------|---------------------------------------|--------------------------------------------------------|-------------|-------------|-------------|-------------|
|        |                                       | Addition to C-Glc minimal medium                       |             |             |             |             |
|        |                                       | -                                                      | Ile         | Pro         | His         | CAA         |
| GP314  | <i>pgi-lacZ</i>                       | 48 $\pm$ 3                                             | ND          | ND          | ND          | ND          |
| GP3612 | <i>azlB-lacZ</i>                      | 4 $\pm$ 0.6                                            | 3 $\pm$ 0.7 | 2 $\pm$ 0.2 | 4 $\pm$ 0.6 | 7 $\pm$ 1.5 |
| GP3614 | <i>azlB-lacZ</i> $\Delta$ <i>azlB</i> | 26 $\pm$ 5                                             | 25 $\pm$ 2  | 31 $\pm$ 4  | 31 $\pm$ 4  | 49 $\pm$ 7  |
| GP3617 | <i>azlB-lacZ</i> $\Delta$ <i>gltR</i> | 3 $\pm$ 0.3                                            | ND          | ND          | ND          | 5 $\pm$ 0.1 |
| GP3611 | <i>yrdF-lacZ</i>                      | 3 $\pm$ 0.7                                            | 4 $\pm$ 1   | 2 $\pm$ 0.3 | 5 $\pm$ 2   | ND          |
| GP3613 | <i>yrdF-lacZ</i> $\Delta$ <i>azlB</i> | 3 $\pm$ 0.3                                            | 3 $\pm$ 0.6 | 3 $\pm$ 0.1 | 3 $\pm$ 0.4 | ND          |

618

619

620

621 **Table 2.** *B. subtilis* strains used in this study

| Strain | Genotype                                                                                                                                       | Source or Reference             |
|--------|------------------------------------------------------------------------------------------------------------------------------------------------|---------------------------------|
| 168    | <i>trpC2</i>                                                                                                                                   | Laboratory collection           |
| GP314  | <i>trpC2 amyE::(P<sub>pgi</sub>-lacZ cat)</i>                                                                                                  | 54                              |
| GP983  | <i>trpC2 ΔcdaS::ermC</i>                                                                                                                       | 49                              |
| GP997  | <i>trpC2 ΔcdaA::cat</i>                                                                                                                        | 49                              |
| GP2032 | <i>trpC2 ΔcdaA::cat ΔcdaS::ermC</i>                                                                                                            | GP997 → GP983                   |
| GP2142 | <i>trpC2 ΔdisA::tet</i>                                                                                                                        | This study                      |
| GP2222 | <i>trpC2 ΔcdaA::cat ΔcdaS::ermC ΔdisA::tet</i>                                                                                                 | 21                              |
| GP2715 | <i>trpC2 ΔdisA::spc</i>                                                                                                                        | This study                      |
| GP2782 | <i>trpC2 ΔdisA::kan</i>                                                                                                                        | This study                      |
| GP3588 | <i>trpC2 ΔcdaA::cat ΔcdaS::ermC ΔdisA::tet azlB</i><br><i>fs(pos 126 +T) ktrD fs(pos 72 -T) kimA fs(pos 128 +GTCGCAT) gltT</i><br>(Thr342 Trp) | Suppressor of GP2222 (30mM His) |
| GP3600 | <i>trpC2 ΔazlB::spec</i>                                                                                                                       | This study                      |
| GP3601 | <i>trpC2 ΔazlBCD::kan</i>                                                                                                                      | This study                      |
| GP3604 | <i>trpC2 ΔcdaA::cat ΔcdaS::ermC ΔazlBCD::kan</i>                                                                                               | GP3601 → GP2032                 |
| GP3605 | <i>trpC2 ΔcdaA::cat ΔcdaS::ermC ΔazlB::spec</i>                                                                                                | GP3600 → GP2032                 |
| GP3606 | <i>trpC2 ΔcdaA::cat ΔcdaS::ermC ΔdisA::spec</i><br><i>ΔazlBCD::kan</i>                                                                         | GP2715 → GP3604                 |
| GP3607 | <i>trpC2 ΔcdaA::cat ΔcdaS::ermC ΔdisA::kan</i><br><i>ΔazlB::spec</i>                                                                           | GP2782 → GP3605                 |
| GP3611 | <i>trpC2 amyE::(P<sub>yrdf</sub>-lacZ aphA3)</i>                                                                                               | pGP3807 → 168                   |
| GP3612 | <i>trpC2 amyE::(P<sub>azlB</sub>-lacZ aphA3)</i>                                                                                               | pGP3808 → 168                   |

|        |                                                                                                               |                                 |
|--------|---------------------------------------------------------------------------------------------------------------|---------------------------------|
| GP3613 | <i>trpC2 ΔazlB::spec amyE::(P<sub>yrdf</sub>-lacZ aphA3)</i>                                                  | pGP3807 → GP3600                |
| GP3614 | <i>trpC2 ΔazlB::spec amyE::(P<sub>azlB</sub>-lacZ aphA3)</i>                                                  | pGP3808 → GP3600                |
| GP3615 | <i>trpC2 ΔgltR::spec</i>                                                                                      | This study                      |
| GP3617 | <i>trpC2 ΔgltR amyE::(p<sub>azlB</sub>-lacZ aphA3)</i>                                                        | pGP3808 → GP3615                |
| GP3622 | <i>trpC2 ΔazlCD::kan</i>                                                                                      | This study                      |
| GP3623 | <i>trpC2 ΔazlBCD::spec</i>                                                                                    | This study                      |
| GP3625 | <i>trpC2 ΔcdaA::cat ΔcdaS::ermC ΔazlBCD::spec</i>                                                             | GP3623 → GP2032                 |
| GP3626 | <i>trpC2 ΔcdaA::cat ΔcdaS::ermC ΔazlBCD::spec</i><br><i>ganA::(p<sub>degQ36</sub>-azlC aphA3)</i>             | pGP3811 → GP3625                |
| GP3627 | <i>trpC2 ΔcdaA::cat ΔcdaS::ermC ΔazlBCD::spec</i><br><i>ganA::(p<sub>degQ36</sub>-azlCD aphA3)</i>            | pGP3812 → GP3625                |
| GP3638 | <i>trpC2 ΔcdaA::cat ΔcdaS::ermC ΔdisA::tet</i><br><i>azlB (Asn24 Ser)</i>                                     | Suppressor of GP2222 (15mM His) |
| GP3639 | <i>trpC2 ΔcdaA::cat ΔcdaS::ermC ΔdisA::tet azlB<sub>fs</sub></i><br><i>(pos 37 +CATTAAATG)</i>                | Suppressor of GP2222 (15mM His) |
| GP3642 | <i>trpC2 ΔcdaA::cat ΔcdaS::ermC ΔdisA::tet</i><br><i>ΔazlBCD::spec ganA::(p<sub>degQ36</sub>-azlCD aphA3)</i> | GP2142 → GP3626                 |
| GP3643 | <i>trpC2 ΔcdaA::cat ΔcdaS::ermC ΔdisA::tet</i><br><i>ΔazlBCD::spec ganA::(p<sub>degQ36</sub>-azlC aphA3)</i>  | GP2142 --> GP3627               |
| GP4202 | <i>trpC2 ΔhutH::spec</i>                                                                                      | This study                      |
| GP4205 | <i>trpC2 ΔhutH::spec ΔcdaA::cat ΔcdaS::ermC</i>                                                               | GP4202 → GP2032                 |
| GP4206 | <i>trpC2 ΔhutH::spec ΔcdaA::cat ΔcdaS::ermC</i><br><i>ΔdisA::kan</i>                                          | GP2782 → GP4205                 |

622

623

624 **Figure legends**

625

626 **Fig. 1 The isolated suppressors are resistant to histidine stress.** Growth of *B. subtilis* suppressor mutants  
627 (GP3638, GP3639 and GP3588) in the presence of histidine. All suppressors carry different mutations in  
628 the *azlB* gene (see Table 2). Cells were harvested and washed, and the OD<sub>600</sub> was adjusted to 1.0. Serial  
629 dilutions were added dropwise to MSSM minimal plates with the indicated histidine concentration.  
630 Plates were incubated at 42°C for 48 h.

631

632 **Fig. 2 AzlCD is strongly overexpressed in the histidine suppressors. A.** Northern Blot analysis to test the  
633 expression levels of the *azl* operon in the suppressor mutants GP3638 and GP3639. The RNA was isolated  
634 from MSSM minimal medium during exponential growth phase. The *gapA* probe was used together with  
635 wild type RNA as control to estimate band sizes and strength, as it is strongly expressed under normal  
636 conditions. **B.** Transcriptional organization of the *azl* operon. The length of the individual transcripts is  
637 indicated by the arrows.

638

639 **Fig. 3 The *azlB* mutation confers resistance to histidine stress. A.** Sensitivity of wild type *B. subtilis* (168)  
640 and the  $\Delta azlB$  (GP3600) and  $\Delta azlBCD$  (GP3601) mutants to histidine. Cells were grown in MSSM minimal  
641 medium to an OD<sub>600</sub> of 1.0 and then diluted 10-fold to create dilutions ranging from 10<sup>-1</sup> to 10<sup>-6</sup>. The  
642 dilution series was dropped onto MSSM plates without and with (15 mM) histidine. The plates were  
643 incubated at 37°C for 48 h. **B.** Growth of  $\Delta dac \Delta azl$  (GP3606),  $\Delta dac \Delta azlB$  (GP3607) and  $\Delta dac \Delta azl$   
644 complemented with *azlC* (GP3643) and *azlCD* (GP3642) respectively.  $\Delta azl$  indicates a deletion of the  
645 *azlBCD* genes. Cells were grown as described above. The plates were incubated at 42°C for 48 h.

646

647 **Fig. 4 AzlCD is a histidine exporter in *B. subtilis*.** Box-whisker plot of the intracellular (A) and  
648 extracellular (B) histidine levels of *B. subtilis*  $\Delta azlB$ ,  $\Delta azlBCD$ , and  $\Delta azlCD$  mutants relative to the wild

649 type strain 168. The red lines indicate the median values of 12 biological replicates. The upper box edges  
650 show the 75<sup>th</sup> percentiles, the lower edges the 25<sup>th</sup> percentiles. The whiskers indicate the furthest points  
651 that are not considered outliers. The red crosses indicate outliers. Differences between indicated pairs of  
652 strains were tested for significance using a Wilcoxon rank sum test at a significance level  $\alpha$  of 0.05. p-  
653 values  $< 0.05$  were considered statistically significant. The stars indicate the orders of magnitude of the  
654 p-values: \* =  $p < 0.05$ ; \*\* =  $p < 0.01$ ; \*\*\* =  $p < 0.001$ ; \*\*\*\* =  $p < 0.0001$ .

655

656



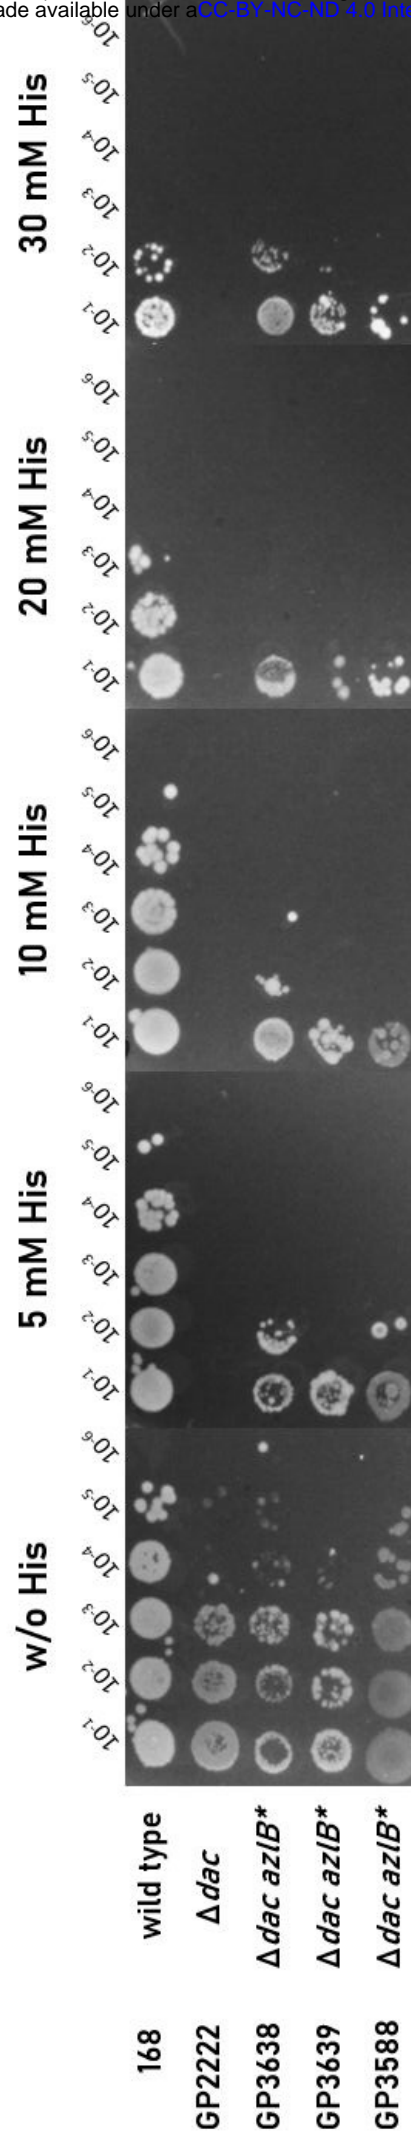

**A**

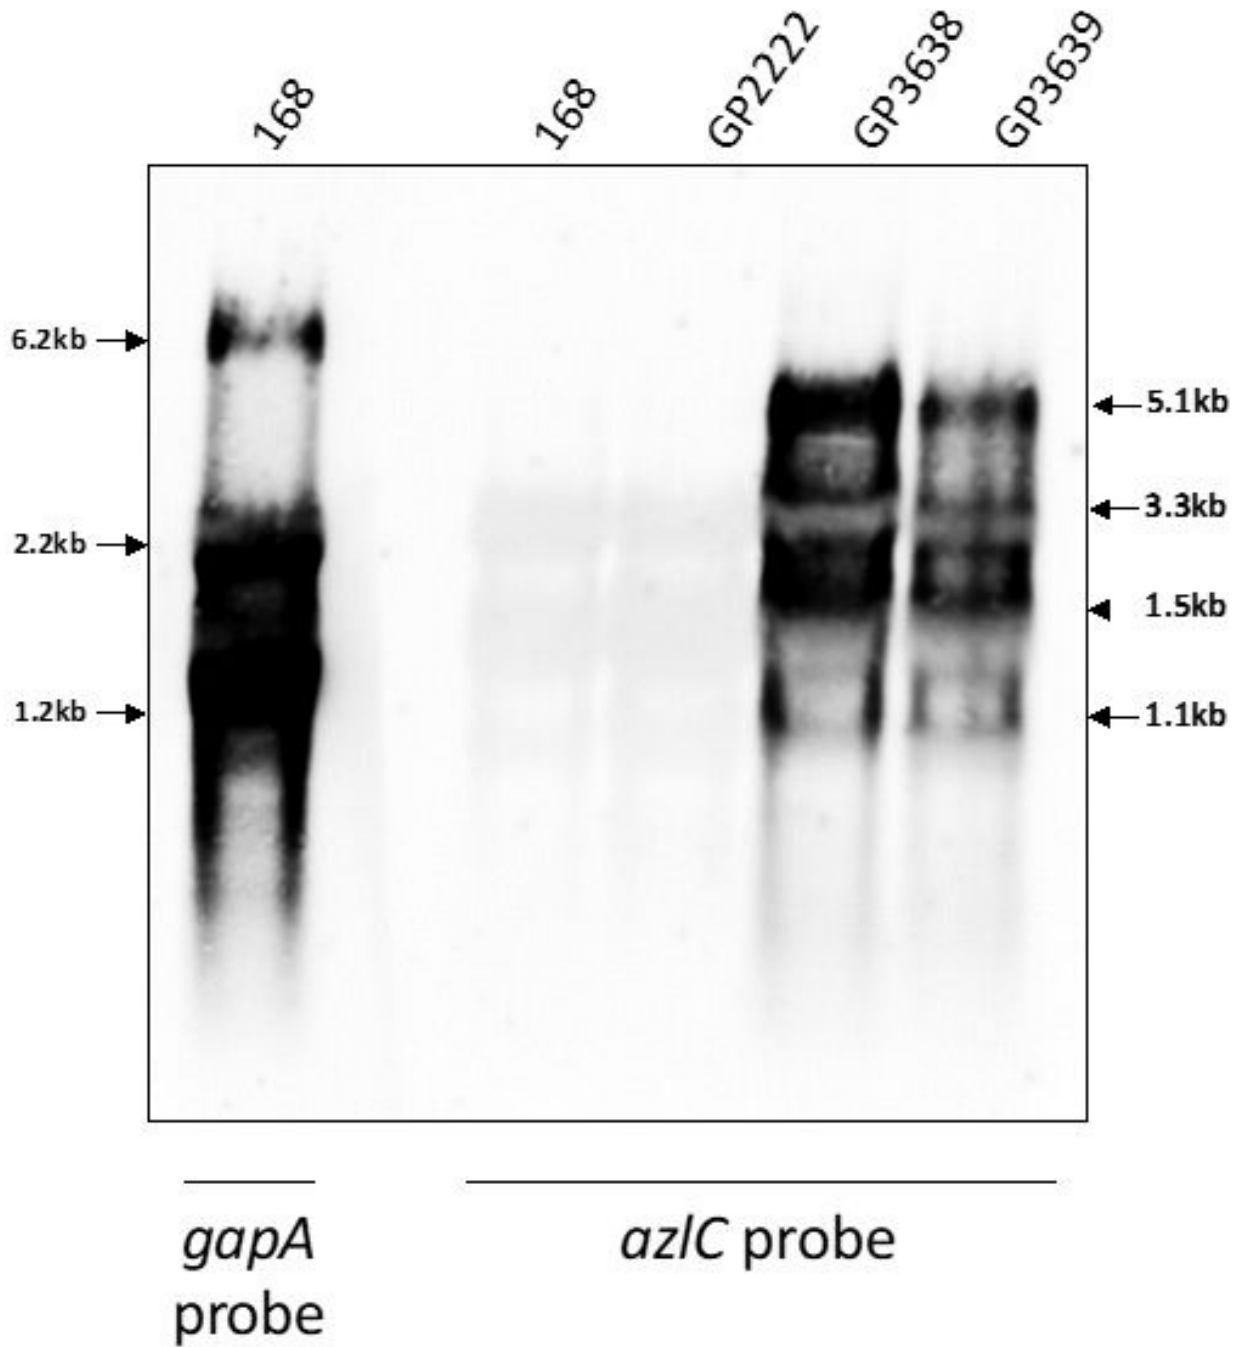

**B**

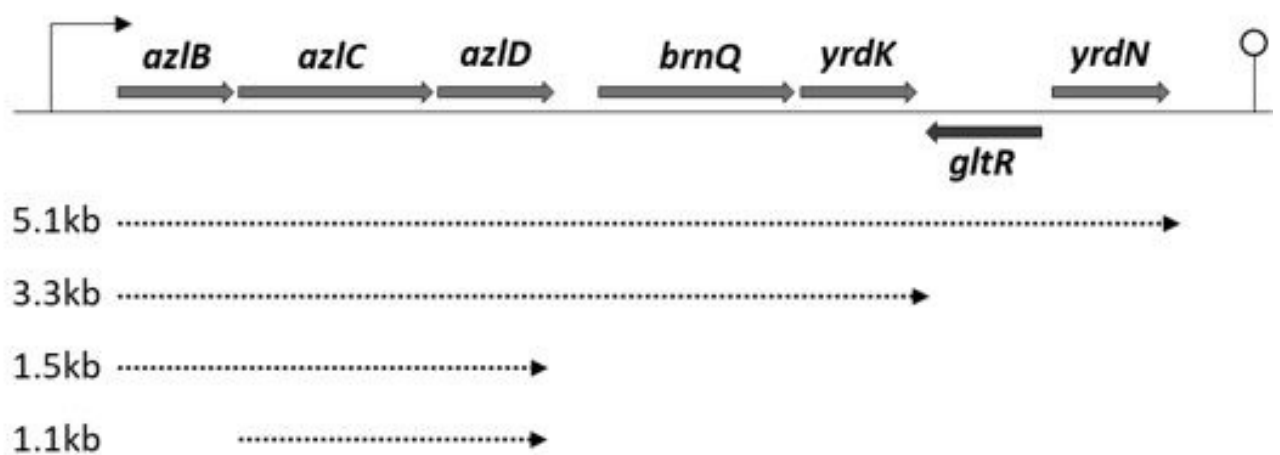

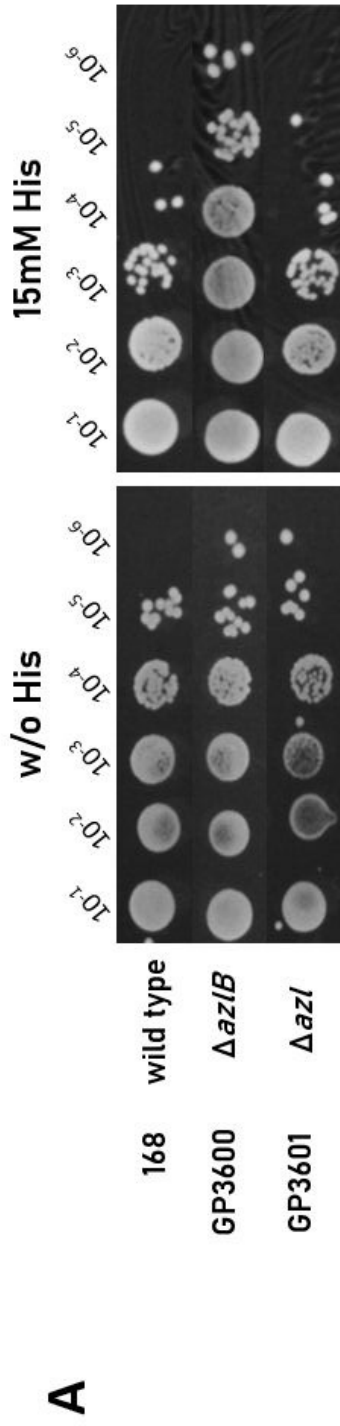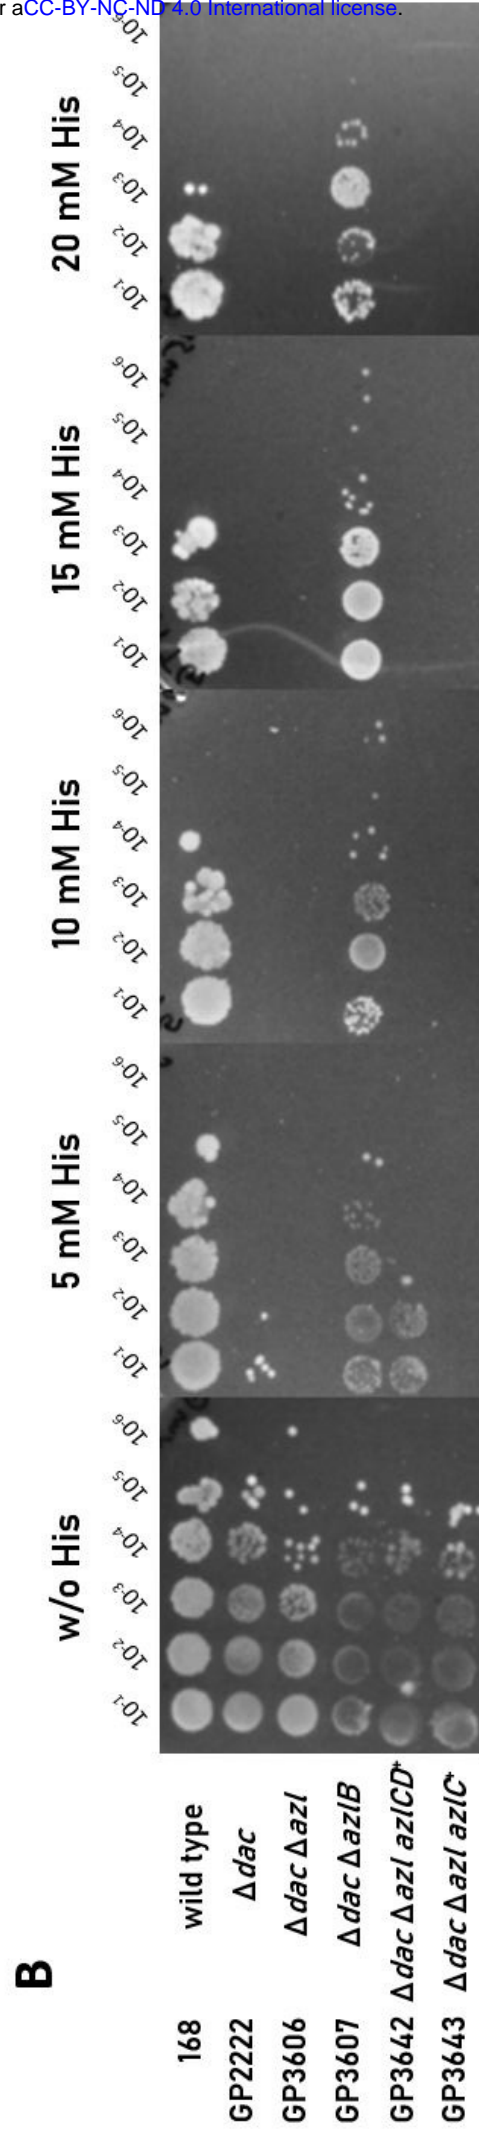

B

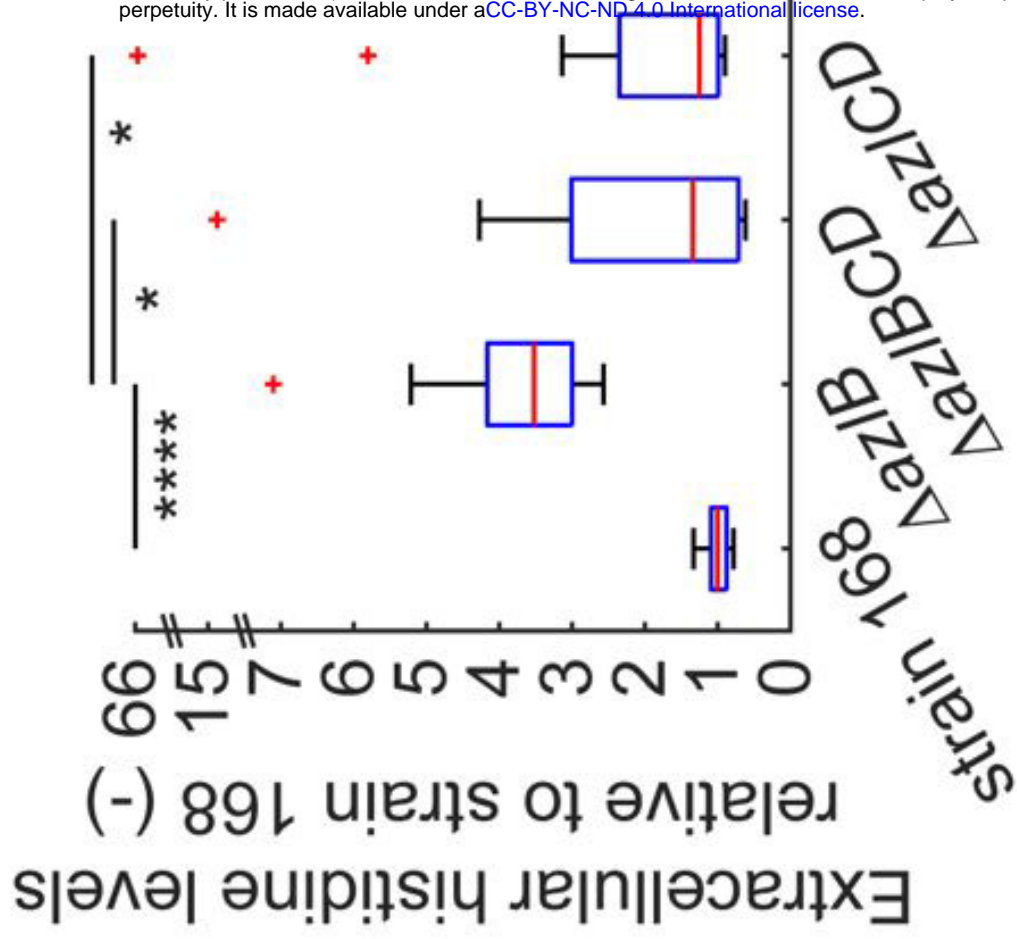

A

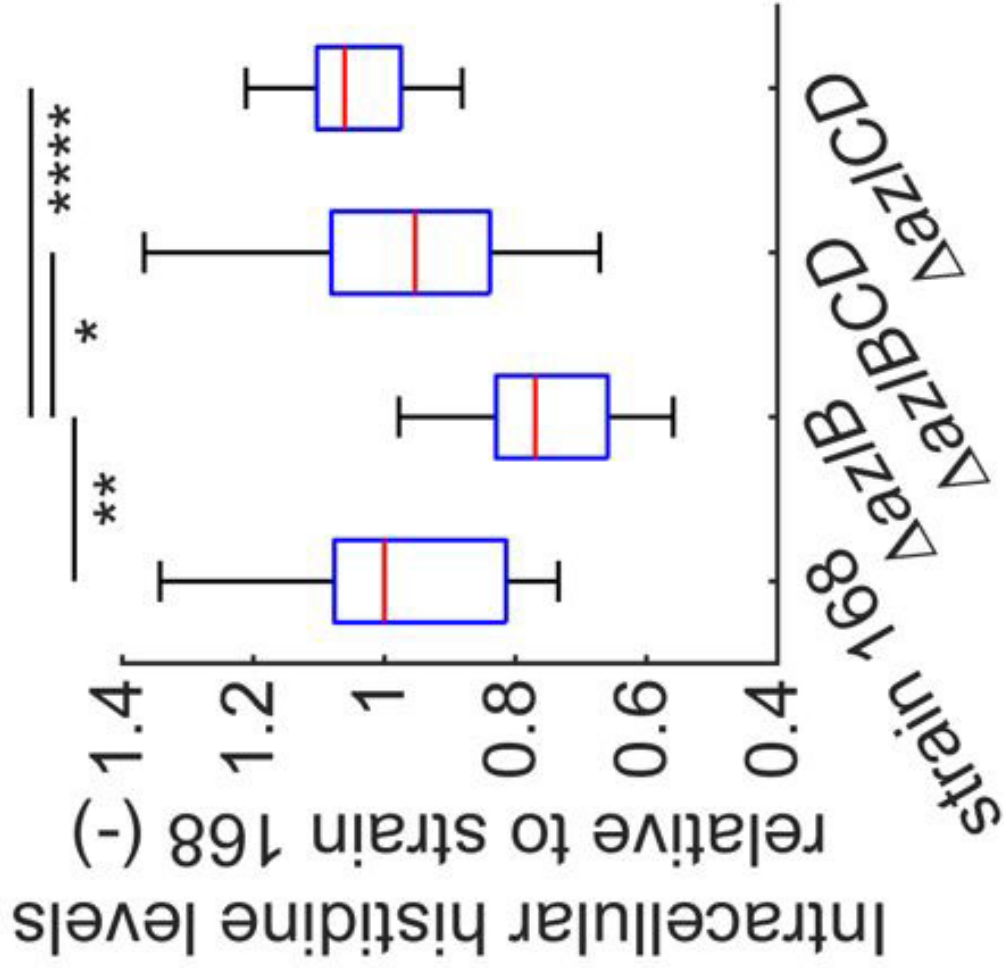

Source: https://www.biorxiv.org/content/10.1101/2022.07.07.499250v2.full.pdf
